# Supplementary material for: Proteins that carry dual targeting signals can act as tethers between peroxisomes and partner organelles
Source: PubMed Central journal article supplement (PMC10906886; doi:10.1371/journal.pbio.3002508), 2024-02-20

**Blot 1: Figure 2F (left)**

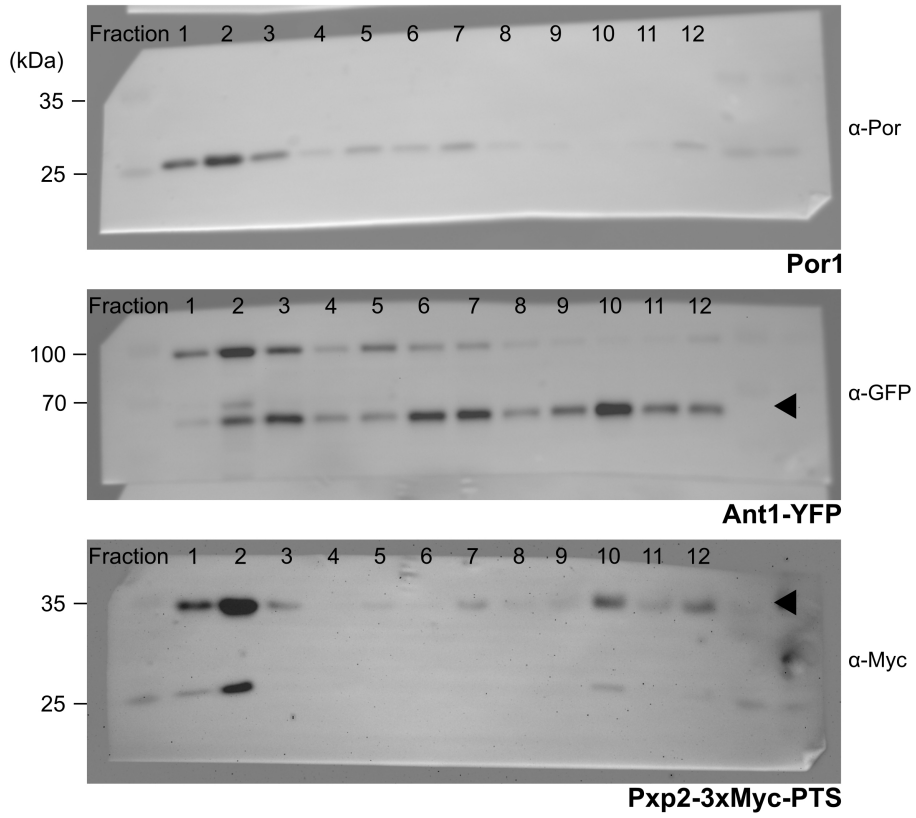

**Blot 2: Figure 2F (right):**

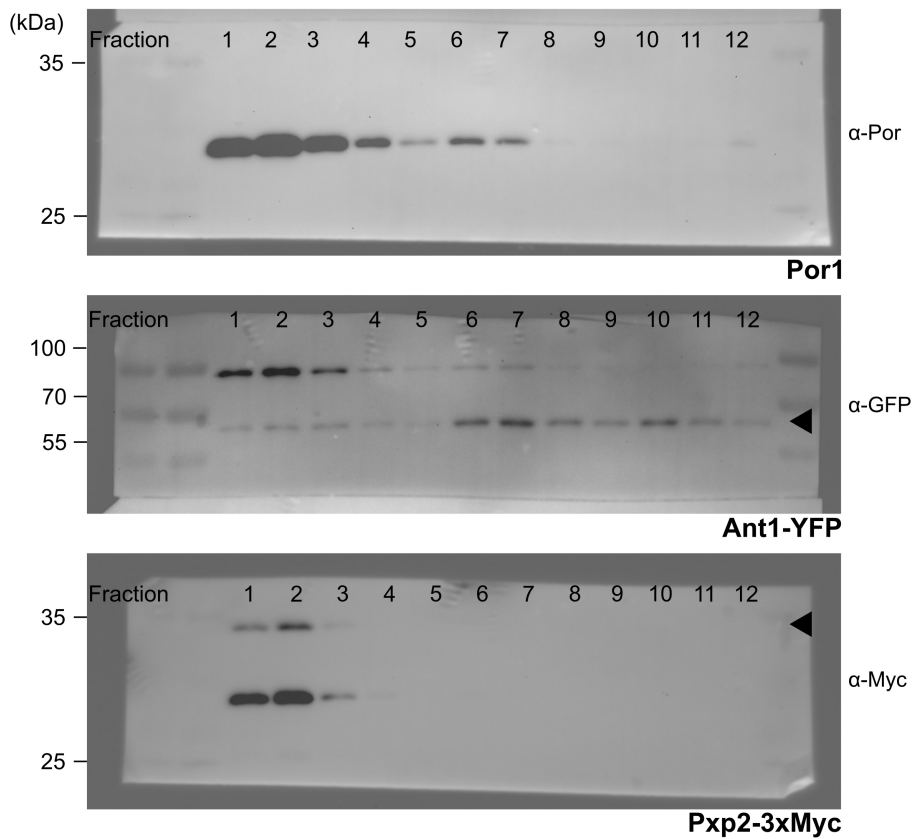

**Blot 3: Figure 3F**

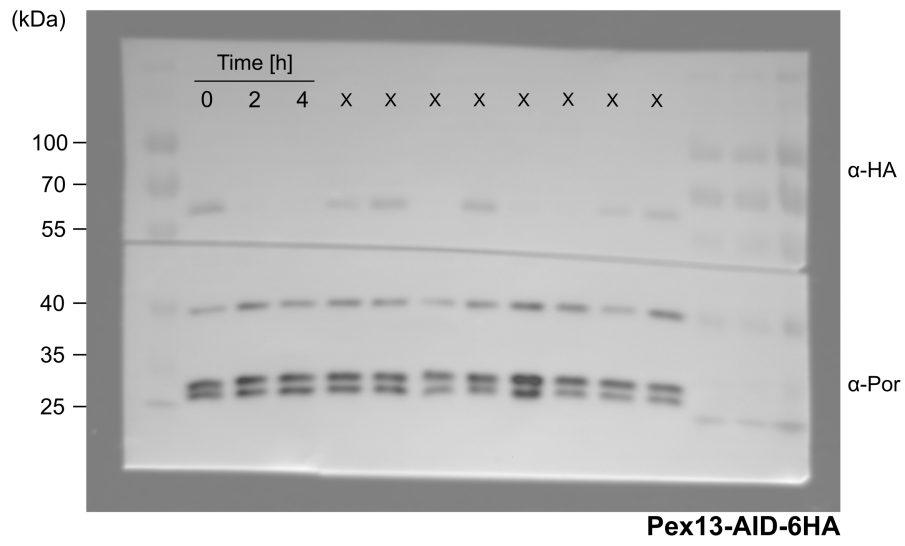

**Blot 4: Figure 4E**

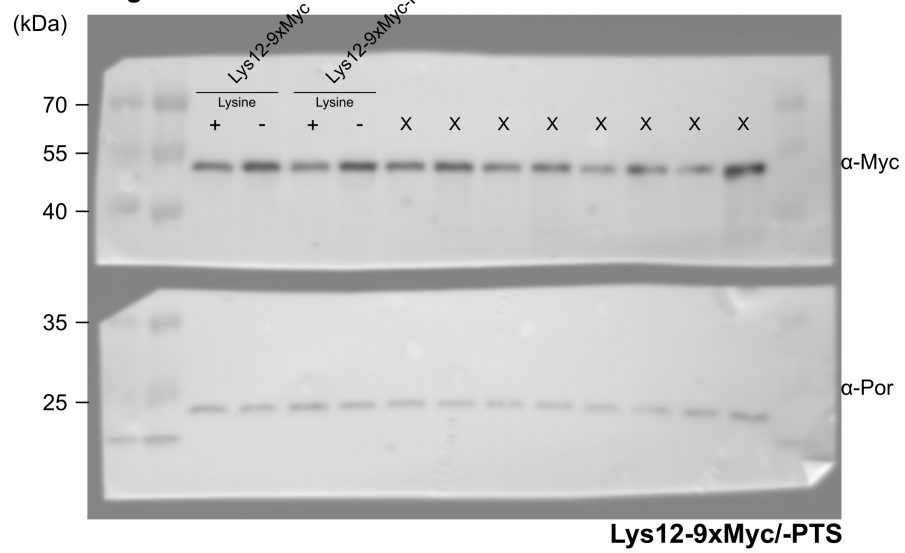

**Blot 5: Figure 6C**

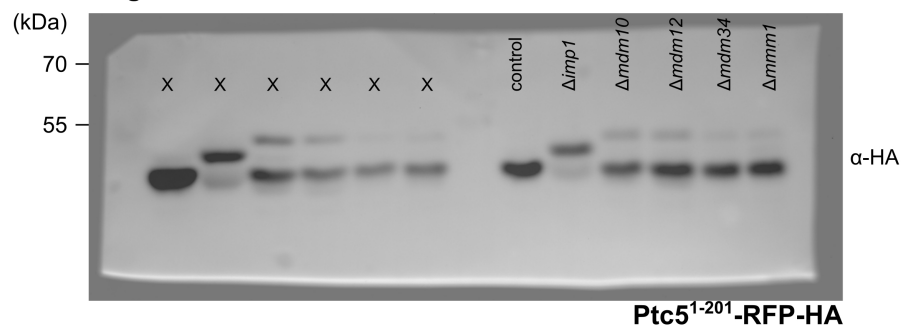

**Blot 6: Figure 6F**

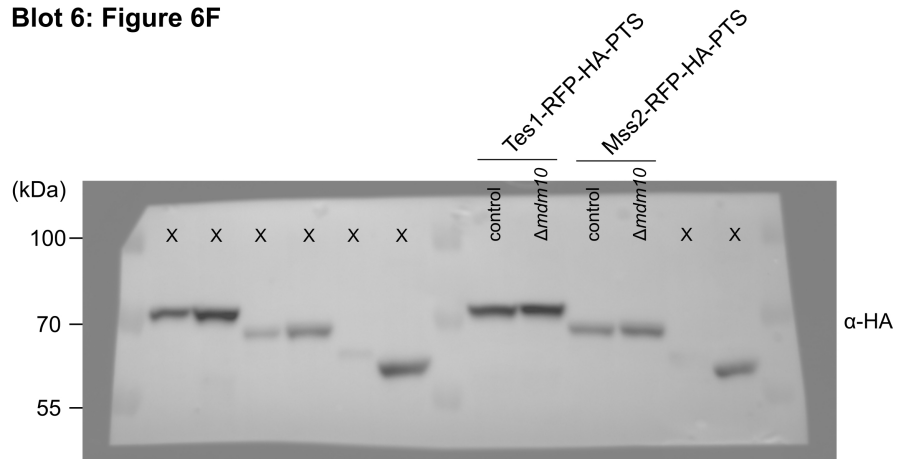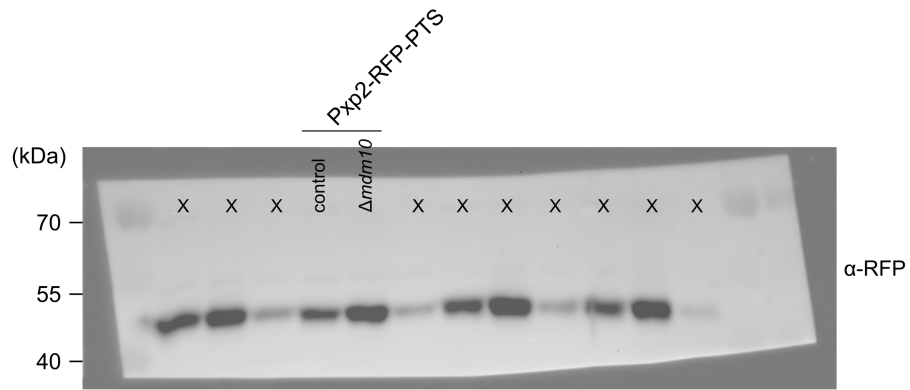

**Blot 7: Figure 8D**

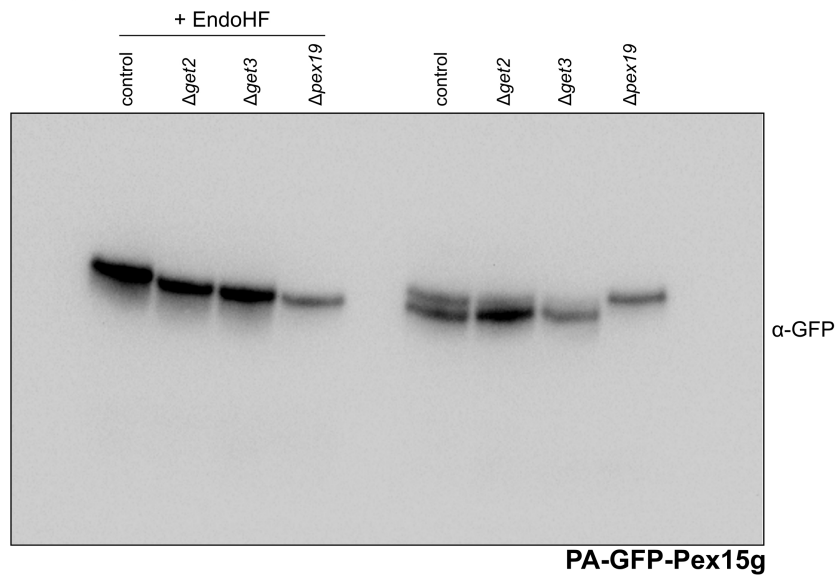

**Blot 8: Figure S2C (upper left)**

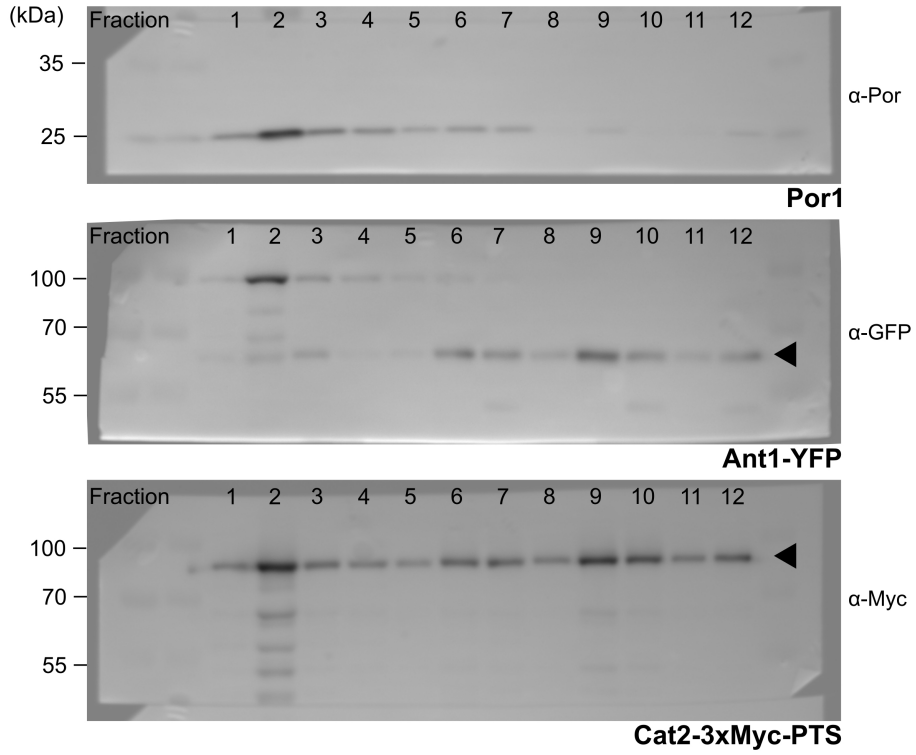

**Blot 9: Figure S2C (downer left)**

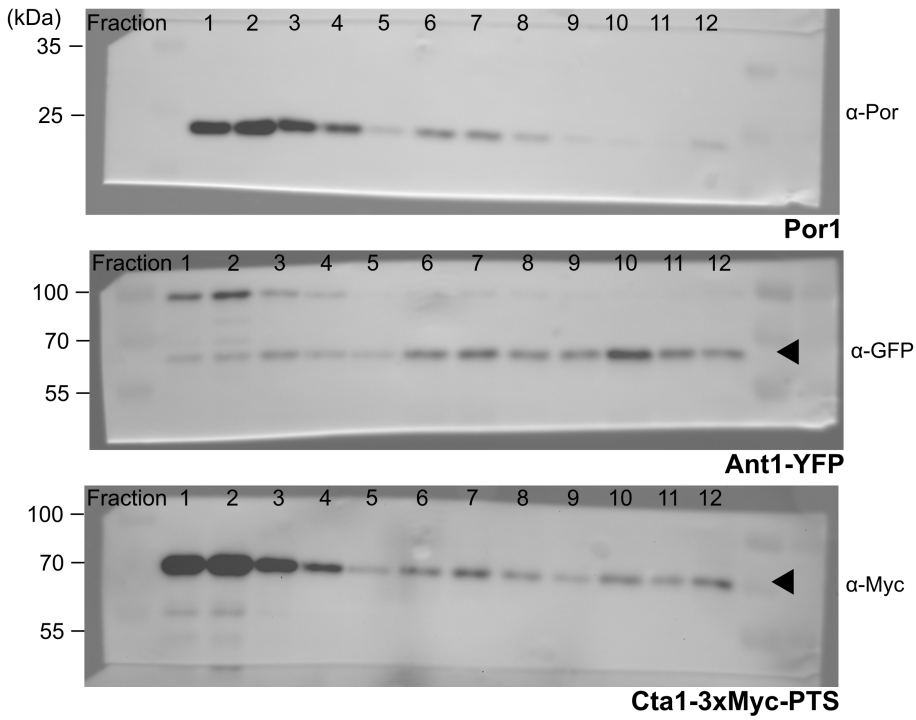

**Blot 10: Figure S2C (right)**

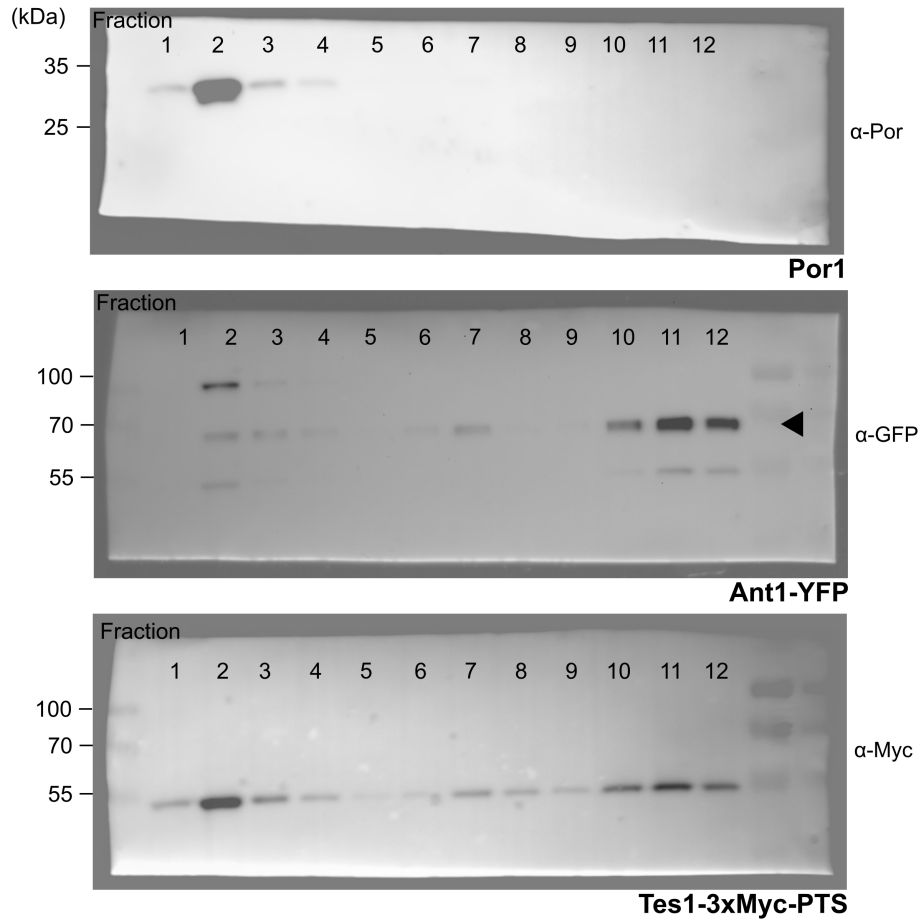

**Blot 11: Figure S7B**

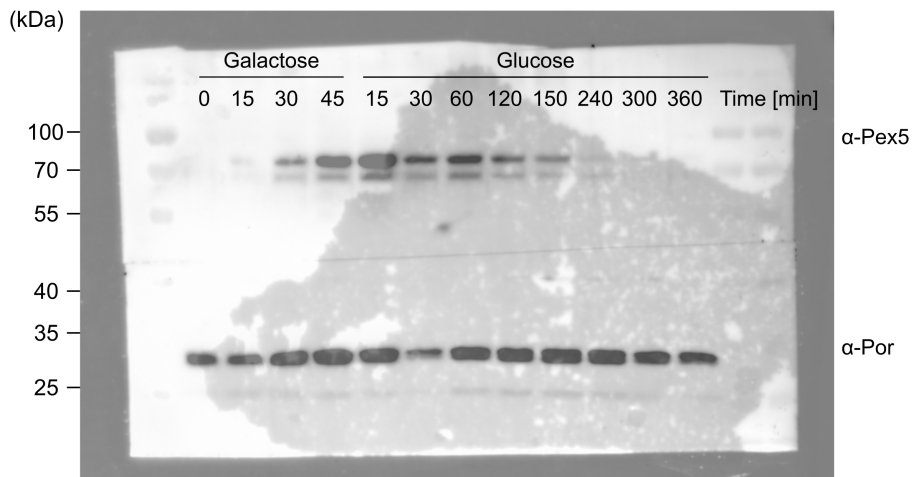



**Blot 14: Figure S20B**

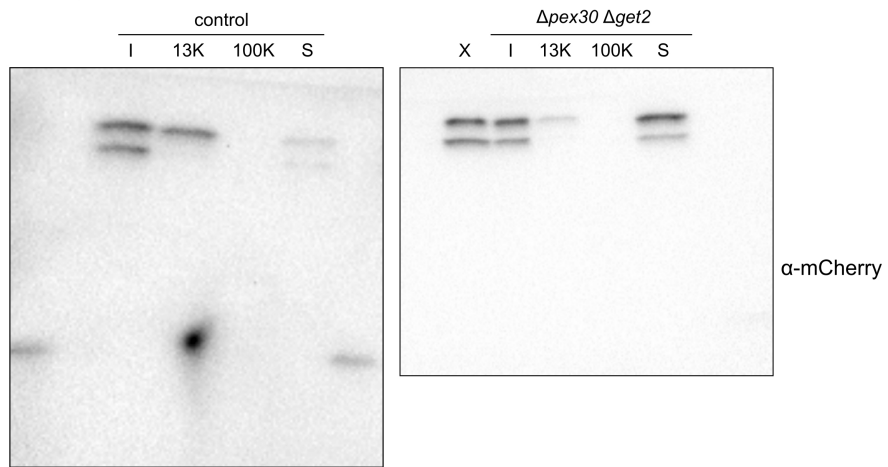

**mCherry-PTS**

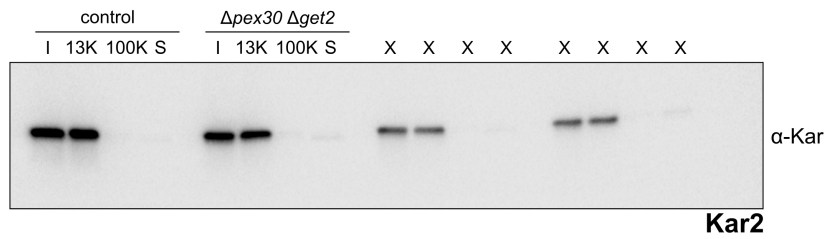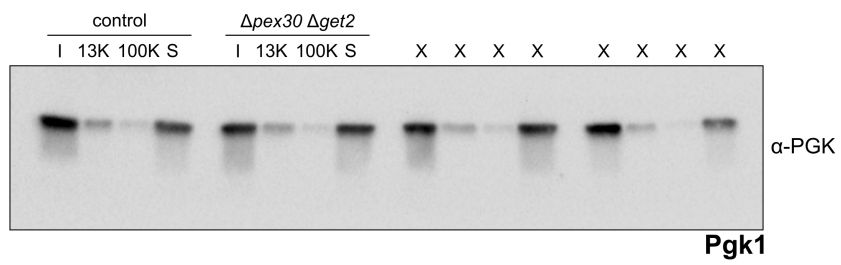

Supplement: pbio.3002508.s028.pdf [file pbio.3002508.s028.pdf]
